# Supplementary material for: Enhanced photoelectric performance of (2Al, S) co-doped rutile SnO2
Source: Royal Society of Chemistry journal article supplement (doi:10.1039/c7ra07891a), 2017-01-01
Supplement: c7ra07891a1.pdf [file c7ra07891a1.pdf]

## Electronic Supplementary Information

### Enhanced photoelectric performance of (2Al, S) co-doped rutile SnO<sub>2</sub>

Minmin Guo<sup>a</sup>, Huimin Yang<sup>a</sup>, Mengting Gao<sup>a</sup>, Erhui Zhang<sup>a</sup>, Zhenhai Liang<sup>a\*</sup>, Peide Han<sup>b</sup>

*a. College of Chemistry and Chemical Engineering, Taiyuan University of Technology,*

*Taiyuan 030024, PR China*

*b. College of Materials Science and Engineering, Taiyuan University of Technology, Taiyuan*

*030024, PR China*

*\*Corresponding author.*

*E-mail addresses: liangzhenh@sina.com; liangzhenhai@tyut.edu.cn (Z. Liang)*

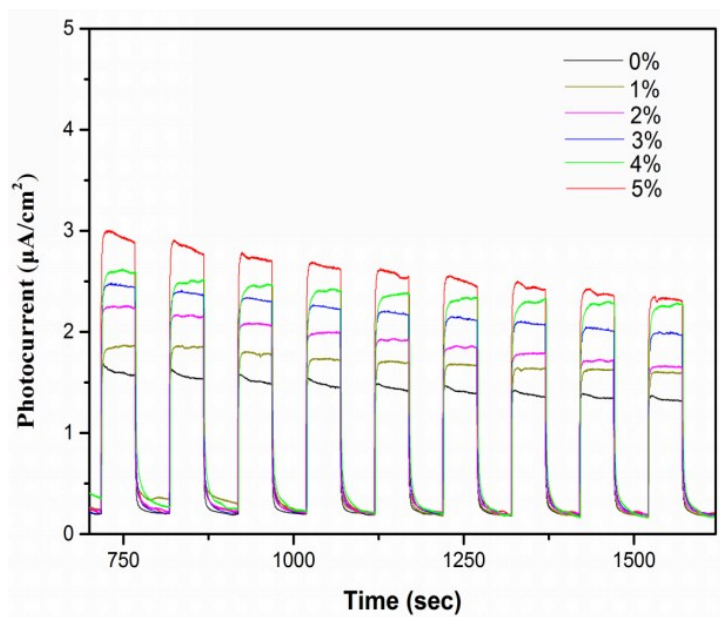

**Fig. S1** Transient photocurrent response curve of 0%-5% (2Al, S) co-doped SnO<sub>2</sub>.

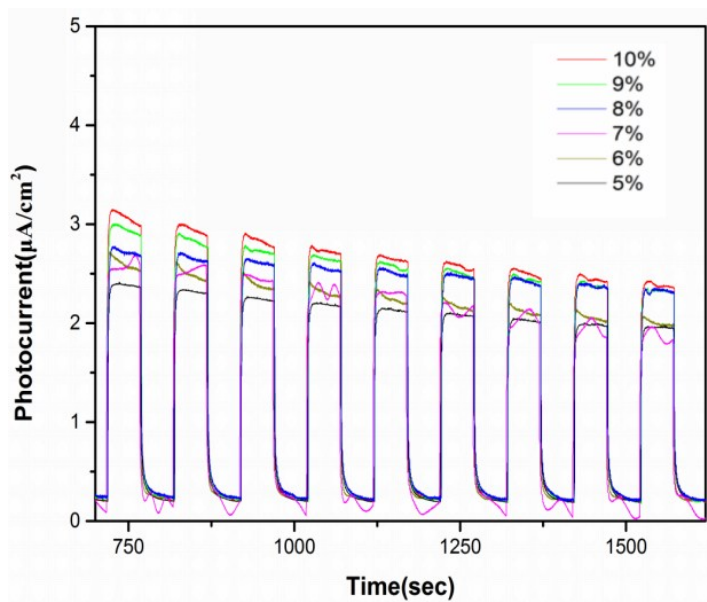

**Fig. S2** Transient photocurrent response curve of 5%-10% (2Al, S) co-doped SnO<sub>2</sub>.
